# Supplementary material for: Effects of Sedation with Medetomidine and Dexmedetomidine on Doppler Measurements of Ovarian Artery Blood Flow in Bitches
Source: MDPI journal article supplement (doi:10.3390/ani11020538), 2021-02-19
Supplement: s1 [file s1]

Article

# Supplementary File: Effects of Sedation with Medetomidine and Dexmedetomidine on Doppler Measurements of Ovarian Artery Blood Flow in Bitches

Paloma Nicolás-Barceló <sup>1,†</sup>, Martina Facchin <sup>1,†</sup>, Fernando Martínez-Taboada <sup>2</sup>, Rafael Barrera <sup>1</sup>, José Ignacio Cristóbal <sup>1</sup>, Mario Alberto González <sup>1</sup>, Ángela Durán-Galea <sup>1</sup>, Beatriz Macías-García <sup>1,\*</sup> and Francisco Javier Duque <sup>1</sup>

**Table S1.** Ovarian flow velocities divided by the oestrus cycle stage prior sedation.

|          | Proestrous<br><i>n</i> = 5 | Oestrus<br><i>n</i> = 2 | Diestrus<br><i>n</i> = 8 | Anoestrus<br><i>n</i> = 5 |
|----------|----------------------------|-------------------------|--------------------------|---------------------------|
| PSV (RO) | 20.8 ± 0.7                 | 31.3 ± 0.4              | 19.9 ± 0.6               | 15.3 ± 0.6                |
| PSV (LO) | 19.05 ± 2.2                | 41.2 ± 5.5              | 18.8 ± 0.7               | 14.8 ± 0.3                |
| EDV (RO) | 8.9 ± 0.4                  | 13.4 ± 1.7              | 8.07 ± 0.7               | 5.3 ± 0.9                 |
| EDV (LO) | 8.06 ± 1.3                 | 10.8 ± 0.8              | 6.8 ± 0.6                | 4.9 ± 0.4                 |
| RI (RO)  | 0.56 ± 0.01                | 0.57 ± 0.06             | 0.6 ± 0.02               | 0.6 ± 0.06                |
| RI (LO)  | 0.58 ± 0.03                | 0.74 ± 0.01             | 0.6 ± 0.02               | 0.7 ± 0.02                |

All the dogs included in the present study (*n* = 20) were grouped by their oestrus cycle stage, and the descriptive statistics Mean ± SEM. Are presented. PSV: Peak systolic velocity; EDV: End diastolic velocity; RI: resistive index.
